# Supplementary material for: The Influence of Ozonation Carried Out during Vegetation on the Content of Selected Bioactive Phytochemicals and the Microbiological Load of Tubers of Raphanus sativus var. sativus
Source: MDPI journal article supplement (doi:10.3390/agriculture13112153), 2023-11-15
Supplement: s1 [file s1]

## SUPPLEMENTARY MATERIALS

### File S1: Mikrobiological analyzes

The radish tubers were subjected to microbiological tests on the first, the fifth and tenth days after the plants were treated with ozone.

The yeast and mould count in 1 g of radish tubers was determined using the method described in PN-EN ISO 21527-1:2009 "Microbiology of food and animal feeding stuffs—Horizontal method for the enumeration of yeasts and moulds. Colony count technique at 25 °C." Enumeration of mesophilic aerobic bacteria in the relevant raw material was performed using the plate count method, in accordance with the standard set forth in (Ae) (O) PB-77/LM, 4th edition dated 07.12.2015. Finally, the presence of endospore producing anaerobes was determined using the method described in (Ae) (O) PB-13/LM, 4th edition, dated 07.04.2014. The analyses were performed in 3 replications.
